# Supplementary material for: Organizational readiness for implementing change: a psychometric assessment of a new measure
Source: Springer Nature journal article supplement (doi:10.1186/1748-5908-9-7), 2014-01-10

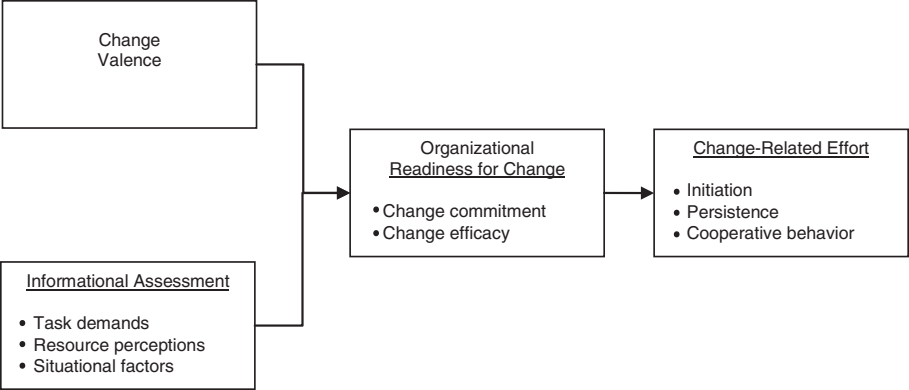

Supplement: 13012_2013_730_MOESM2_ESM.pdf [file 13012_2013_730_MOESM2_ESM.pdf]
